# Supplementary material for: Pesticide dynamics in three small agricultural creeks in Hesse, Germany
Source: PeerJ journal article supplement (doi:10.7717/peerj.15650), 2023-07-18

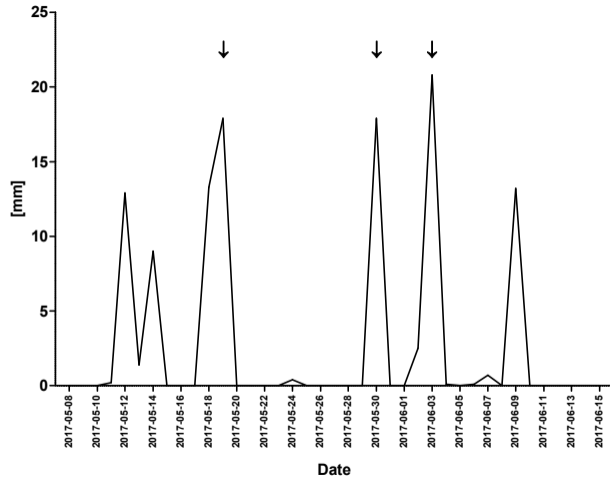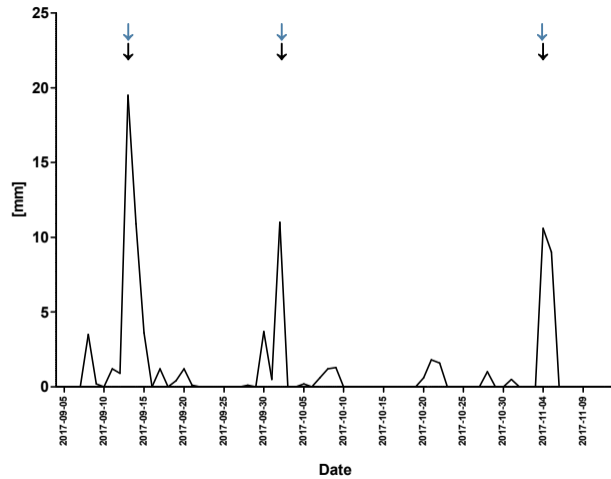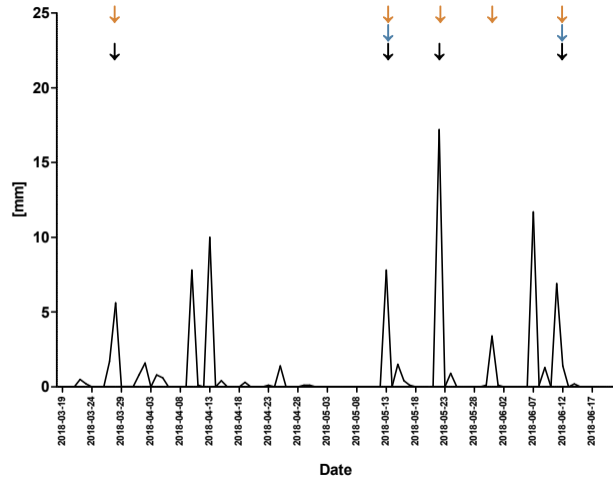

Supplement: Supplemental_Figure_S1.pdf [file Supplemental_Figure_S1.pdf]
